# Supplementary material for: Comparison of Various Nuclear Localization Signal-Fused Cas9 Proteins and Cas9 mRNA for Genome Editing in Zebrafish
Source: PubMed Central journal article supplement (PMC5844304; doi:10.1534/g3.117.300359), 2018-01-02
Supplement: 823FileSI.pdf [file 823FileSI.pdf]

# Supplementary Information

## Comparison of various nuclear localization signal-fused Cas9 proteins and *Cas9* mRNA for genome editing in zebrafish

Peinan Hu<sup>1, 2, 3</sup>, Xueying Zhao<sup>1, 2, 3</sup>, Qinghua Zhang<sup>1, 2, 3</sup>, Weiming Li<sup>1, 4</sup>, Yao Zu<sup>1, 2, 3</sup>.

1. International Research Center for Marine Biosciences, Ministry of Science and Technology, College of Fisheries and Life Sciences, Shanghai Ocean University, Shanghai, 201306, China;

2. Key Laboratory of Exploration and Utilization of Aquatic Genetic Resources, Ministry of Education, College of Fisheries and Life Sciences, Shanghai Ocean University, Shanghai, 201306, China;

3. Key Laboratory of Freshwater Aquatic Genetic Resources, Ministry of Agriculture, College of Fisheries and Life Sciences, Shanghai Ocean University, Shanghai, 201306, China

4. Department of Fisheries and Wildlife, Michigan State University, East Lansing, MI 48824, USA

Corresponding author: Yao Zu (Email: yzu@shou.edu.cn)

**Figure S1**

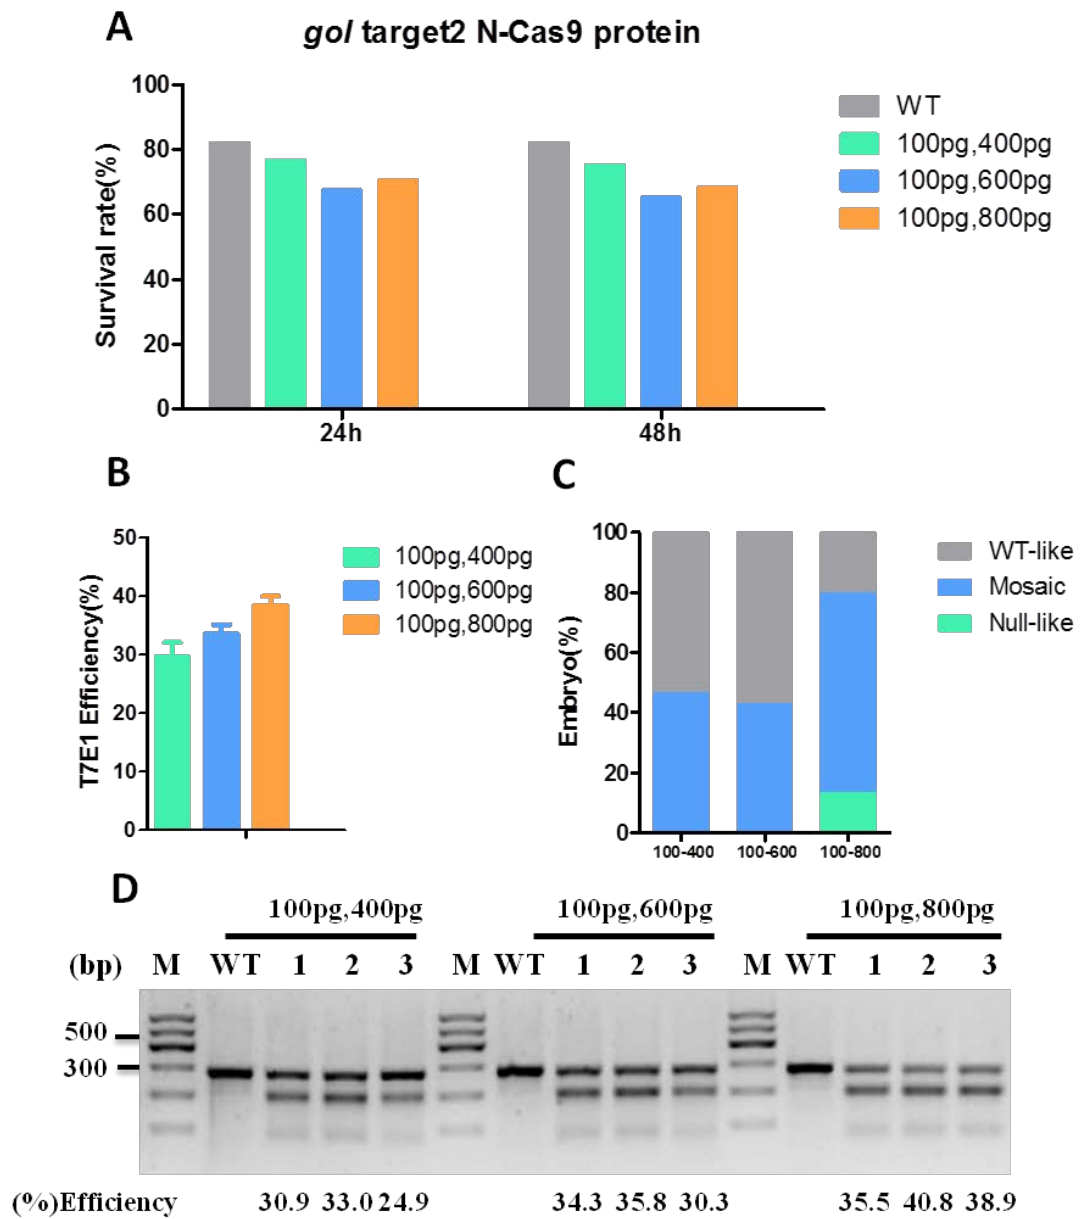

**Figure S1** Survival rates of zebrafish embryos injected N-NLS-fused Cas9 protein and 100pg of gRNA targeting the *gol target2* (A), and T7E1 assays of the rates of mutagenesis (B and D,  $P < 0.05$ ) and proportions of embryos with each phenotype (C) for *gol target 2*.

**Figure S2**

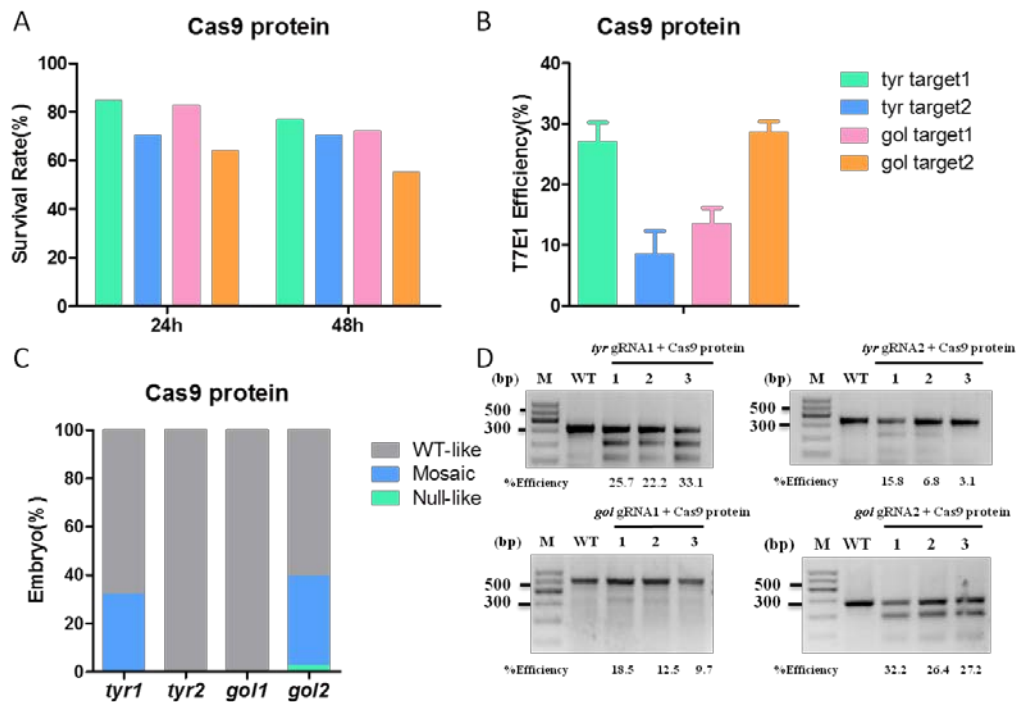

**Figure S2** Knockout efficiency of the Cas9 proteins without NLS for four loci of *tyr* and *gol* gene. Survival rates of zebrafish embryos(A) and T7E1 assays of the rates of mutagenesis for each loci(B and D). (C) Proportions of embryos with each phenotype.

**Figure S3**

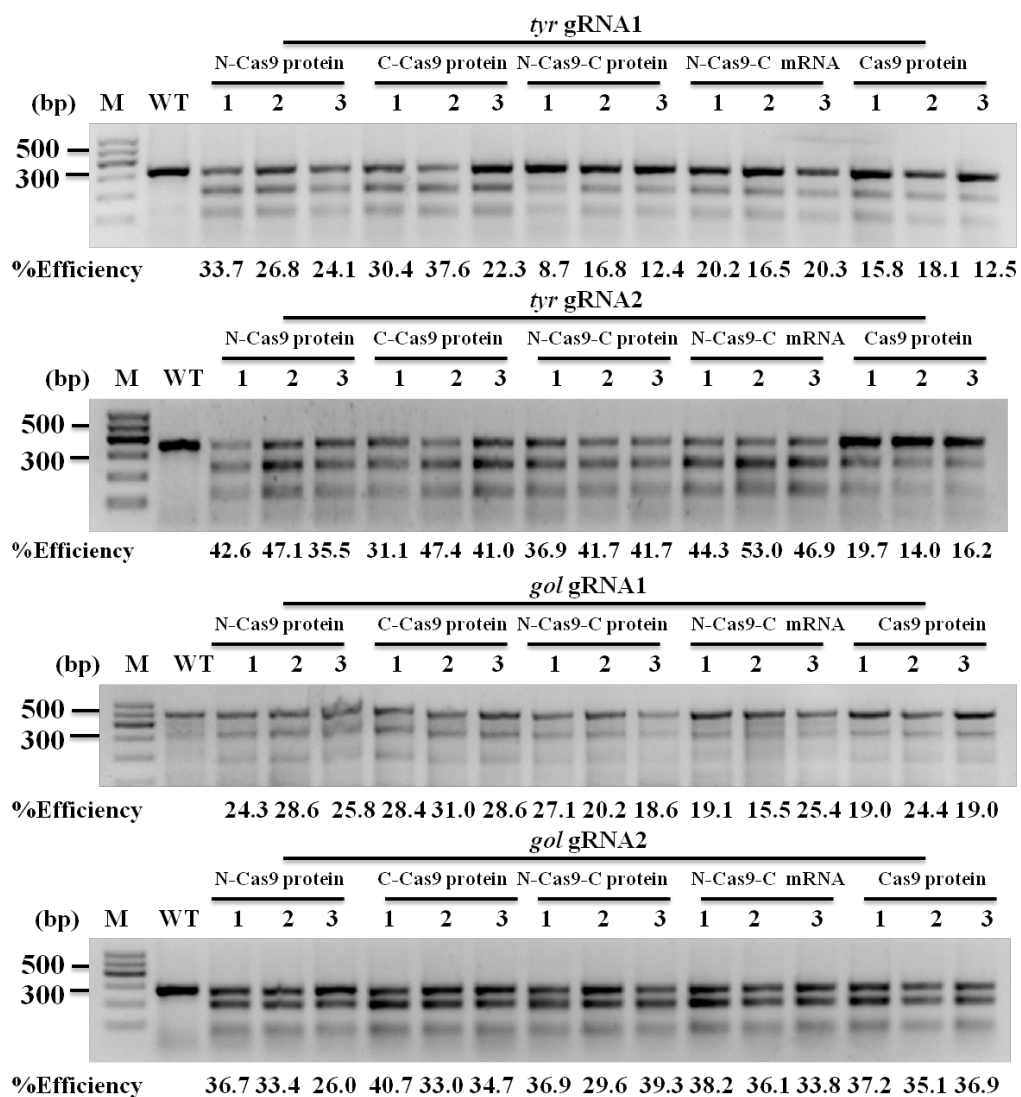

**Figure S3** Multiplex Genome Mutation efficiency of the various NLS-fused Cas9 proteins and Cas9 mRNA for four loci of *tyr* and *gol* gene. T7E1 assays showed the rates of mutagenesis for *tyr* target 1 (A), *tyr* target2 (B), *gol* target1 (C) and *gol* target 2 (D).

**Figure S4**

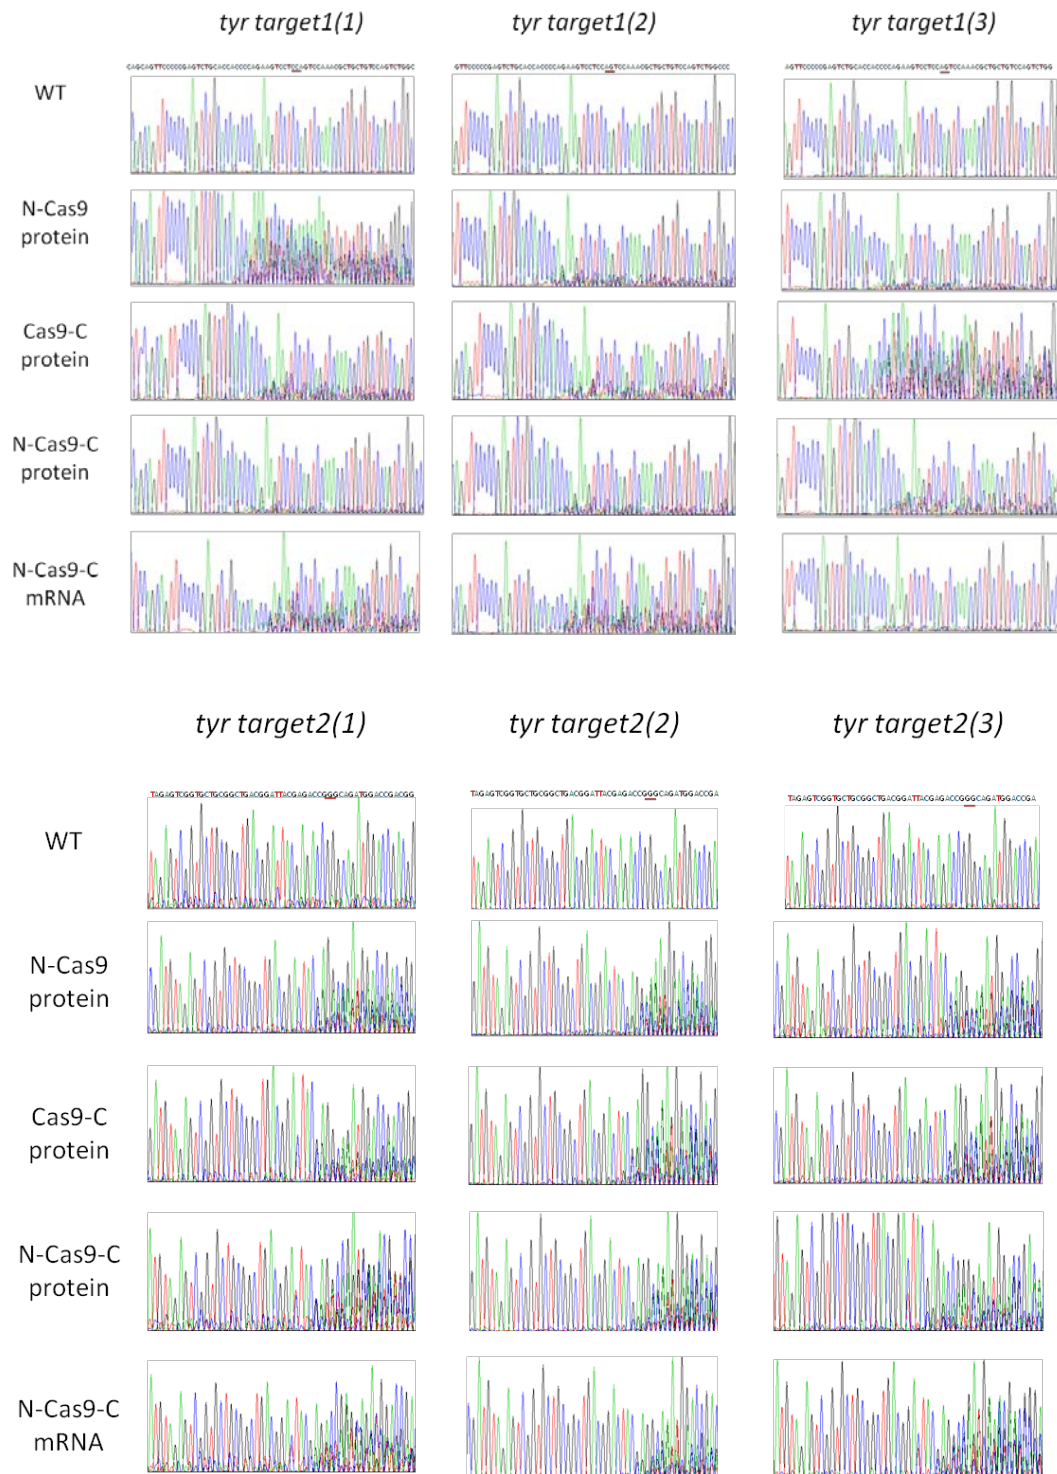

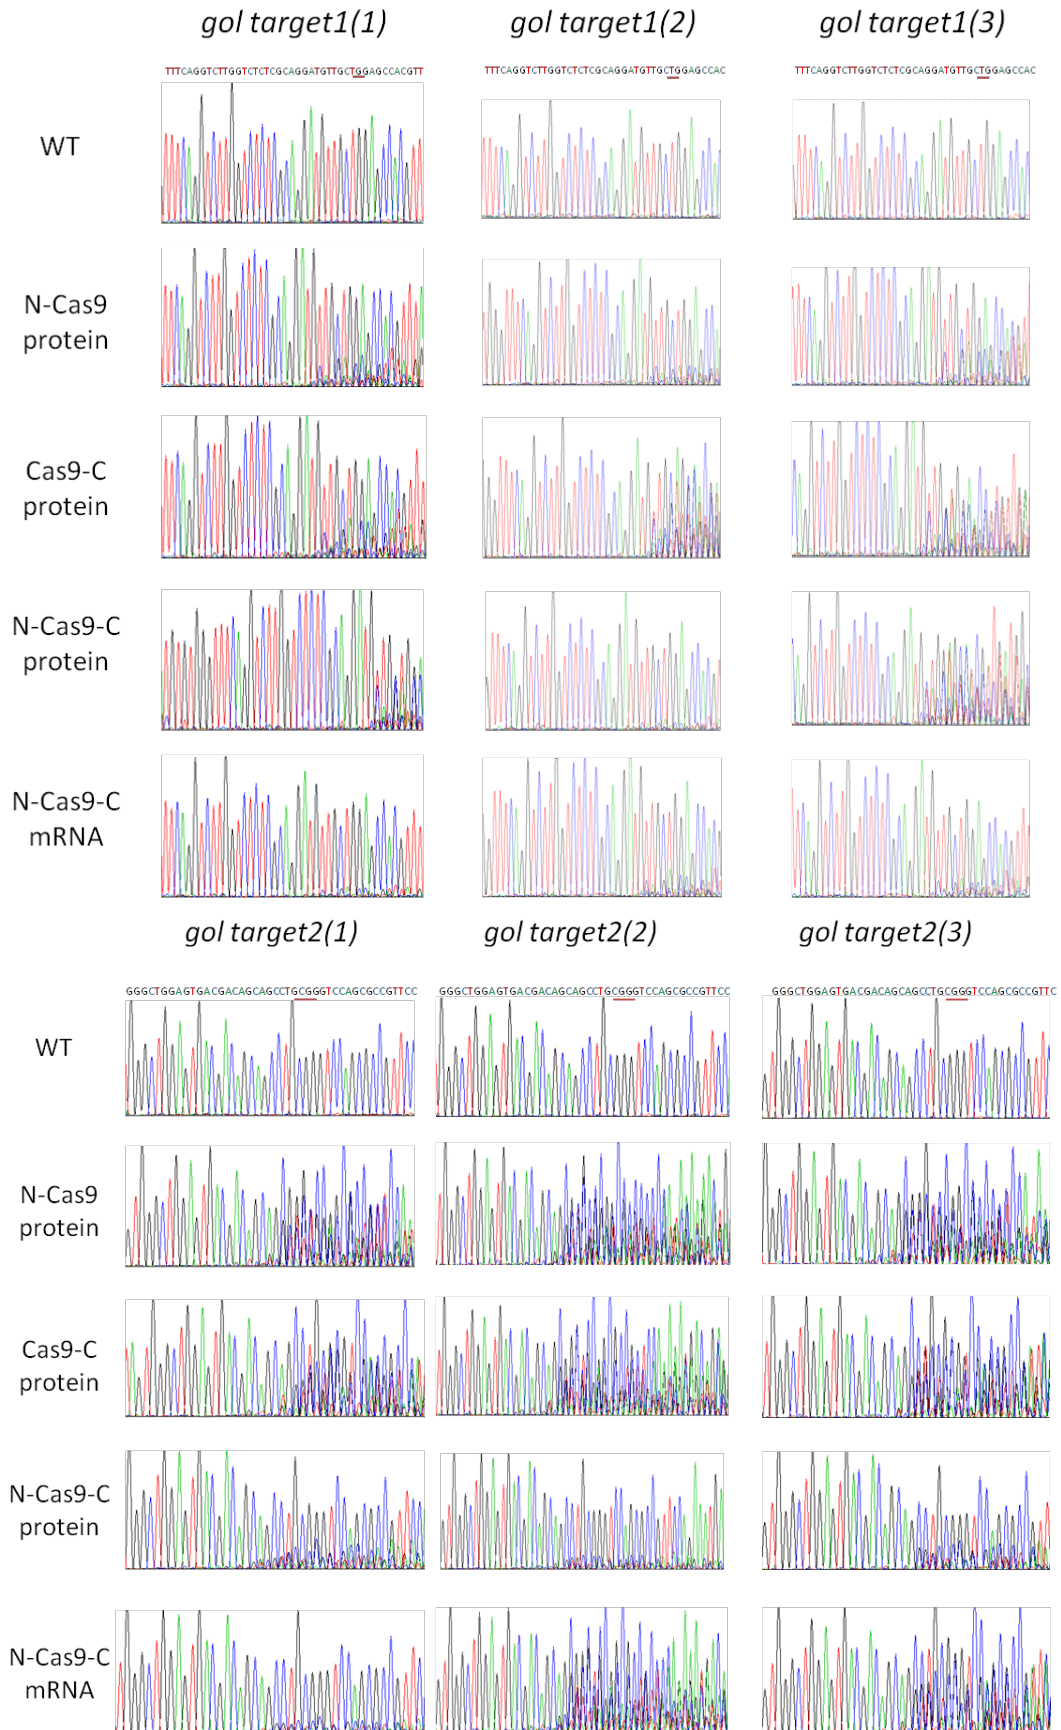

**Figure S4** The PCR Sanger sequencing at two *loci* of *tyr* and two *loci* of *gol*.

## Figure S5

### *tyr* target1:

N-Cas9 protein: (indel:12,WT:5)

WT: TCGTCTCTCCAGCAGTTCACCCGAGTCTGCACCACCCAGAAGTCTCCAGTCCAA  
N1: TCGTCTCTCCAGCAGTTCACCC--TCGTCTCT-----CCAGAAGTCTCCAGCCAA (-11bp,+2bp)  
N2: TCGTCTCTCCAGCAGT-----CCTCCAGTCCAA (-28bp)  
N3: TCGTCTCTCCAGCAGTTCACCCGAGTCTGCACC-----A-----CCTCCAGTCCAA (-10bp)  
N4: TCGTCTCTCCAGCAGTTCACCCGAGTCTGCACCACCC**AC**CAGAAGTCTCCAGTCCAA (+1bp)  
N5: GCAGTTCACCCGAGTCTGCACCACCC**GAGTCTGCACCACCACCC**CAGAAGTCTCCAGT (+16bp)  
N6: TCGTCTCTCCAGCAGTTCACCCGAGTCTGCACCCTCC-----AGTCCAA (-13bp)  
N7: TCGTCTCTCCAGCAGTTCACCCGAGTCTGCACCACCCAGAAGTCTCCAGTCCAA (WT)  
N8: TCGTCTCTCCAGCAGTTCACCCGAGTCTGCACCACCC**AAGTC**CAAGTCTCCAGTCC (-2bp,+5bp)  
N9: TCGTCTCTCCAGCAGTTCACCCGAGTCTGCACCACCCAGAAGTCTCCAGTCCAA (WT)  
N10: TCGTCTCTCCAGCAGTTCACCCGAGTCTGCACCACCCAGAAGTCTCCAGTCCAA (WT)  
N11: TCGTCTCTCCAGCAGT-----CCTCCAGTCCAA (-28bp)  
N12: TCGTCTCTCCAGCAGTTCACCCGAGTCTGCACC-----CAGAAGTCTCCAGTCCAA (-6bp)  
N13: GTCTCTCCAGCAGTTCACCCGAGTCTGCACCACCC**TCC**CAGAAGTCTCCAGTCCAA (+2bp)  
N14: TTCACCCGAGTCTGCACCACCC**GAAGTCCTCCACCACC**CAGAAGTCTCCAGTCCAA (-1bp,+17bp)  
N15: TCCAGCAGTTCACCCGAGTCTGCACCACCC**TCCAGTCC**CAGAAGTCTCCAGTCCAA (+7bp)  
N16: TCGTCTCTCCAGCAGTTCACCCGAGTCTGCACCACCCAGAAGTCTCCAGTCCAA (WT)  
N17: TCGTCTCTCCAGCAGTTCACCCGAGTCTGCACCACCCAGAAGTCTCCAGTCCAA (WT)

C-Cas9 protein: (indel:14,WT:4)

WT: TCGTCTCTCCAGCAGTTCACCCGAGTCTGCACCACCCAGAAGTCTCCAGTCCAA  
C1: TCGTCTCTCCAGCAGTTCACCCGAGTCTGCACCACC-----AA (-18bp)  
C2: TCGTCTCTCCAGCAGTTCACCCGAGTCTGCACCACCCAGAAGTCTCCAGTCCAA (WT)  
C3: TCGTCTCTCCAGCAGTTCACCCGAGTCTGCACCACCCAGAAGTCTCCAGTCCAA (WT)  
C4: TCGTCTCTCCAGCAGTTCACCCGAGTCTGCACCACCCAGAAGTCTCCAGTCCAA (WT)  
C5: TCGTCTCTCCAGCAGTTCACCCGAGTCTGCACC-----GAAGTCTCCAGTCCAA (-8bp)  
C6: TCGTCTCTCCAGCAGTTCACCCGAGTCTGCACCACC-----TCCAGTCCAA (-10bp)  
C7: TCGTCTCTCCAGCAGTTCACCCGAGTCTGCACCACCC**TCC**-AGTCTCCAGTCCAA (-3bp,+2bp)  
C8: C-----**AG**---**CAGAGTGTAAGCCTCTCCGGT**GTGTGTGAGTCTCCAGTCCAA (-32bp,+31bp)  
C9: CTCTCCAGCAGTTCACCCGAGTCTGCACC**ACCC**TCC---AAGTCTCCAGTCCAA (-4bp,+4bp)  
C10: TCGTCTCTCCAGCAGTTCACCCGAGTCTGCACCACCC-----TCCAGTCCAA (-9bp)  
C11: TCGTCTCTCCAGCAGTTCACCCGAGTCTGCACC-----TCCAGTCCAA (-13bp)  
C12: TCGTCTCTCCAGCAGTTCACCCGAGTCTGCACC-----TCCAGTCCAA (-13bp)  
C13: TCGTCTCTCCAGCAGTTCACCCGAGTCTGCACC-----GAAGTCTCCAGTCCAA (-8bp)  
C14: TCGTCTCTCCAGCAGTTCACCCGAGTCTGCACCA-----GAAGTCTCCAGTCCAA (-5bp)  
C15: TCGTCTCCAGCAGTTCACCCGAG**ACT**CTGCACC-----CCAGAAGTCTCCAGTCCAA (-6bp,+2bp)  
C16: TCGTCTCTCCAGCAGTTCACCCGAGTCTGCACCA-----GTCCAA (-16bp)  
C17: CTCTCCAGCAGTTCACCCGAGTCTGCACC**ACCC**TCC---AAGTCTCCAGTCCAA (-4bp,+4bp)  
C18: TCGTCTCTCCAGCAGTTCACCCGAGTCTGCACCACCCAGAAGTCTCCAGTCCAA (WT)

N-Cas9-C protein: (indel:16,WT:3)

WT: TCGTCTCTCCAGCAGTTCCCCCGAGTCTGCACCACCCAGAAGTCCTCCAGTCCAA  
B1: TCGTCTCTCCAGCAGTTCCCCCGAGTCTGCACCACCT-AGAAGTCCTCCAGTCCAA (-2bp, +1bp)  
B2: TCGTCTCTCCAGCAGTTCCCCCGAGTCTGCA-----GAAGTCCTCCAGTCCAA (-8bp)  
B3: TCGTCTCTCCAGCAGTTCCCCCGAGTCTGCA-----GAAGTCCTCCAGTCCAA (-8bp)  
B4: TCGTCTCTCCAGCAGTTCCCCCGAGTCTGCACCACC-----AGTCCTCCAGTCCAA (-5bp)  
B5: TCGTCTCTCCAGCAGTTCCCCCGAGTCTGCACCACC--AGAAGTCCTCCAGTCCAA (-2bp)  
B6: TCGTCTCTCCAGCAGTTCCCCCGAGTCTGCACCA-----AGTCCTCCAGTCCAA (-7bp)  
B7: CAGCAGTTTCCCCGAGTCTGCACCA**CCAC**CACCAGAAGTCCTCCAGTCCAGTCCAA (+4bp)  
B8: AGTCCCCCGAGTCTGCACCA-----GAAGTCCTCCAGTCCAAACGCTGCTGTCCAA (-5bp)  
B9: CGTCTCTCCAGCAGTTCCCCCGAGTCTGCACCAC---AGAAGTCCTCCAGTCCAA (-3bp)  
B10: TCGTCTCTCCAGCAGTTCCCCCGAGTCTGCACCA-----GAAGTCCTCCAGTCCAA (-5bp)  
B11: TCGTCTCTCCAGCAGTTCCCCCGAGTCTGCA-----GAAGTCCTCCAGTCCAA (-8bp)  
B12: TCGTCTCTCCAGCAGTTCCCCCGAGTCTGCACCACCCAGAAGTCCTCCAGTCCAA (WT)  
B13: GTCTCTCTCCAGCAGTTCCCCCGAGTCTGCACCA-----GAAGTCCTCCAGTCCAA (-5bp)  
B14: TCGTCTCTCCAGCAGTTCCCCCGAGTCTGCACCACCCAGAAGTCCTCCAGTCCAA (WT)  
B15: TCGTCTCTCCAGCAGTTCCCCCGAGTCTGCACCA**GA**--AGAAGTCCTCCAGTCCAA (-4bp, +2bp)  
B16: TCGTCTCTCCAGCAGTTCCCCCGAGTCTGCACCA-----GAAGTCCTCCAGTCCAA (-5bp)  
B17: TCGTCTCTCCAGCAGTTCCCCCGAGTCTGCACCACCC-----TCCAGTCCAA (-9bp)  
B18: TCGTCTCTCCAGCAGTTCCCCCGAGTCTGCACCAGTCCAGAAGTCCTCCAGTCCAA (-2bp, +3bp)  
B19: TCGTCTCTCCAGCAGTTCCCCCGAGTCTGCACCACCCAGAAGTCCTCCAGTCCAA (WT)

N-Cas9-C mRNA: (indel:12,WT:6)

WT: TCGTCTCTCCAGCAGTTCCCCCGAGTCTGCACCACCCAGAAGTCCTCCAGTCCAA  
m1: TCGTCTCTCCAGCAGTTCCCCCGAGTCTGCACCACCCAGAAGTCCTCCA**AT**CCAA (-1bp, +1bp)  
m2: TCGTCTCTCCAGCAATCCCCCGAGTCTGCA-----GTCCAA (-19bp)  
m3: TCGTCTCTCCAGCA**GT**CCCCCGAGTCTGCACCT-CCCAGAAGTCCTCCAGTCCAA (-3bp, +2bp)  
m4: TCGTCTCTCCAGCAGTTCCCCCGAGTCTGCACCT**T**CCCAGAAGTCCTCCAGTCCAA (-1bp, +2bp)  
m5: TCGTCTCTCCAGCAGTTCCCCCGAGTCTGCACCACCCAGAAGTCCTCCAGTCCAA (WT)  
m6: GCAGTCCCCCGAGTCTGCACC-----TCC-----CTGTC (-26bp)  
m7: TCGTCTCTCCAGCAGTTCCCCCGAGTCTGCACCACCCAGAAGTCCTCCAGTCCAA (WT)  
m8: TCCCCCGAGTCTGCACCACCC**TGCA****CCACAAGAGTCTGCACCA****CA**AGTCCTCCAGT (-21bp, +1bp)  
m9: TCGTCTCTCCAGCAGTTCCCCCGAGTCTGCACCACCCAGAAGTCCTCCAGTCCAA (WT)  
m10: TCGTCTCTCCAGCAGTTCCCCCGAGTCTGCACCACCCAGAAGTCCTCCAGTCCAA (WT)  
m11: TCGTCTCTCCAGCAGTTCCCCCGAGTCTGCACCACC--AGAAGTCCTCCAGTCCAA (-2bp)  
m12: GTCTCTCCAGCAGTTCCCCCGAGTCTGCACCACCC**GG**CAGAAGTCCTCCAGTCCAA (+2bp)  
m13: TCGTCTCTCCAGCAGTTCCCCCGAGTCTGCACCACCCAGAAGTCCTCCAGTCCAA (WT)  
m14: GTCTCTCCAGCGTTCCCCCGAGTCTGCACCACCC**T**CAGAAGTCCTCCAGTCCAA (+2bp)  
m15: TCGTCTCTCCAGCAGTTCCCCCGAGTCTGCACCAG---GAAGTCCTCCAGTCCAA (-4bp)  
m16: TCTCCAGCAGTTCCCCCGAGTCTGCACCACCCAGAAGTCCTCCAGTCCAA (WT)  
m17: TCGTCTCTCCAGCAGTTCCCCCGAGTCTGCACCACCT**T**CC--AGTCCTCCAGTCCAA (-3bp, +1bp)  
m18: TCGTCTCTCCAGCAGTTCCCCCGAGTCTGCACCACC-----AGTCCAA (-13bp)



## Figure S6

### *tyr* target2:

N-Cas9 protein: (indel:19,WT:0)

WT: AGTCGGTGCTGCGGCTGACGGACTACGAGACCGGGCAGATGGACCGACGGGCAAACCTG  
N1: AGTCGGTGCTGCGGCTGACGGACTACGAGCA--GGCAGATGGACCGACGGGCAAACCTG (-4bp, +2bp)  
N2: AGTCGGTGCTGCGGCTGACGGACTAC-----CGGGCAGATGGACCGACGGGCAAACCTG (-5bp)  
N3: TCGGTGCTGCGGCTGACGGACTACGACTACCGGGCAGATGGACCGACGGGCAAACCTG (-1bp, +2bp)  
N4: -----CAGATGGAC (-65bp)  
N5: AGTCGGTGCTGCGGCTGACGGACTAC-----CGGGCAGATGGACCGACGGGCAAACCTG (-5bp)  
N6: AGTCGGTGCTGCGGCTGACGGACTACG-----GGCAAATGGACCGACGGGCAAACCTG (-6bp)  
N7: AGTCGGTGCTGCGGCTGACGGACTACGA----GGGCAGATGGACCGACGGGCAAACCTG (-4bp)  
N8: AGTCGGTGCTGCGGCTGACGGACTAC-----CGGGCAGATGGACCGACGGGCAAACCTG (-5bp)  
N9: AGTCGGTGCTGCGGCTGACGGACTACGA-----GCAGATGGACCGACGGGCAAACCTG (-6bp)  
N10: AGTCGGTGCTGCGGCTGACGGACTACGA-----GCAGATGGACCGACGGGCAAACCTG (-6bp)  
N11: AGTCGGTGCTGCGGCTGACGGACTACGA-----GCAGATGGACCGACGGGCAAACCTG (-6bp)  
N12: AGTCGGTGCTGCGGCTGACGGA-----CCGACGGGCAAACCTG (-21bp)  
N13: AGTCGGTGCTGCGGCTGACGGACTACGA-----GCAGATGGACCGACGGGCAAACCTG (-6bp)  
N14: AGTCGGTGCTGCGGCTGACGGA---CT-----ACGGGCAAACCTG (-22bp)  
N15: GGTGCTGCGGCTGACGGACTACGAGGACTACCGGGCAGATGGACCGACGGGCAAACCTG (+4bp)  
N16: AGTCGGTGCTGCGGCTGACGGACTAC-----CGGGCAGATGGACCGACGGGCAAACCTG (-5bp)  
N17: GGTGCTGCGGCTGACGGACTACGACGACTACCGGGCAGATGGACCGACGGGCAAACCTG (-1bp, +5bp)  
N18: GTGCTGCGGCTGACGGACTACGA-----GGCAGATGGACCGACGGGCAAACCTGAGCTG (-5bp)  
N19: GTGCTGCGGCTGACGGACTACGA-----GGCAGATGGACCGACGGGCAAACCTGAGCTG (-5bp)

C-Cas9 protein: (indel:18,WT:0)

WT: GAGTCGGTGCTGCGGCTGACGGACTACGAGACCGGGCAGATGGACCGACGGGCAAACCTG  
C1: GTGCTGCGGCTGACGGATTACGAGCAGATGGACCGGGCAGATGGACCGACGGGCAAACCTG (-1bp, +7bp)  
C2: GAGTCGGTGCTGCGGCTGACGGATTACGAG-----GCAGATGGACCGACGGGCAAACCTG (-5bp)  
C3: GAGTCGGTGCTGCGGCTGACGGACTAC--GACCGGGCAGATGGACCGACGGGCAAACCTG (-2bp)  
C4: GAGTCGGTGCTGCGGCTGACGGATTAC-----CGGGCAGATGGGCGGACGGGCAAACCTG (-5bp)  
C5: GAGTCGGTGCTGCGGCTGACGGA---CT--ACCGGGCAGATGGACCGACGGGCAAACCTG (-6bp, +1bp)  
C6: GAGTCGGTGCTGC-----CGGGCAGATGGACCGACGGGCAAACCTG (-19bp)  
C7: ATTACGATCTCTCGCATATTTGATAGCTTAACCGGGCAGATGGACCGACGGGCAAACCTG (+22bp)  
C8: CTGC--GGATCCGGGT-----ACCGGGCAG (-40bp, +2bp)  
C9: AGTCGGTGCTGCGGCTGACGG-----GCAGATGGACCGACGGGCAAACCTG (-13bp)  
C10: GTCGGTGCTGCGGCTGACGGACTACGAGTAGCTA-----CGACGGGCAAACCTG (-10bp, +5bp)  
C11: AGTCGGTGCTGCGGCTGACGGACTA-----CGGGCAGATGGACCGACGGGCAAACCTG (-6bp)  
C12: GAGTCGGTGCTGCGGCTGACGGA---CT--ACCGGGCAGATGGACCGACGGGCAAACCTG (-5bp)  
C13: AGTCGGTGCTGCGGCTGACGGACTACG--GACCGGGCAGATGGACCGACGGGCAAACCTG (-1bp)  
C14: AGTCGGTGCTGCGGCTGACGGACTACGA-----GGCAGATGGACCGACGGGCAAACCTG (-5bp)  
C15: AGTCGGTGCTGCGGCTGACGGACTACGA-----GCAGATGGACCGACGGGCAAACCTG (-6bp)  
C16: TGCTGCGGCTGACGGACTACGATGGGCAGACCGGGCAGATGGACCGACGGGCAAACCTG (+6bp)  
C17: GAGTCGGTGCTGCGGCTGACGGACTACGAGAT--GGCAGATGGACCGACGGGCAAACCTG (-3bp, +1bp)  
C18: GAGTCGGTGCTGCGGCTGACGGACTACT--ACCGGGCAGATGGACCGACGGGCAAACCTG (-3bp, +1bp)

N-Cas9-C protein: (indel:14,WT:5)

WT: GAGTCGGTGCTGCGGCTGACGGACTACGAGACCGGGCAGATGGACCGACGGGCAAACCTG  
B1: TGACGGACTACGAGGTACCGCGGCTGCCACCGGGCAGATGGACCGACGGGCAAACCTG (+15bp)  
B2: GAGTCGGTGCTGCGGCTGACGGA---CT--ACCGGGCAGATGGACCGACGGGCAAACCTG (-5bp)  
B3: GCTGCGGCTGACGGACTACGAGCAGATGGACCGGGCAGATGGACCGACGGGCAAACCTG (+7bp)  
B4: AGTCGGTGCTGCGGCTGACGGACTACG-----AGATGGACCGACGGGCAAACCTG (-9bp)  
B5: AGTCGGTGCTGCGGCTGACGGACTACG----GGGCAGATGGACCGACGGGCAAACCTG (-5bp)  
B6: AGTCGGTGCTGCGGCTGACGGACTACGAGACCGGGCAGATGGACCGACGGGCAAACCTG (WT)  
B7: AGTCGGTGCTGCGGCTGACGGATTACGAG----GCAGATGGACCGACGGGCAAACCTG (-5bp)  
B8: GAGTCGGTGCTGCGGCTGACGGA---CT--ACCGGGCAGATGGACCGACGGGCAAACCTG (-5bp)  
B9: AGTCGGTGCTGCGGCTGAC-----CGGGCAGATGGACCGACGGGCAAACCTG (-12bp)  
B10: GAGTCGGTGCTGCGGCTGACGGACTACGAGACCGGGCAGATGGACCGACGGGCAAACCTG (WT)  
B11: GGTGCTGCGGCTGACGGACTACGCCGGGAGATGGGCAGATGGACCGACGGGCAAACCTG (-5bp, +10bp)  
B12: GAGTCGGTGCTGCGGCTGACGGACTACGA---GGGCAGATGGACCGACGGGCAAACCTG (-4bp)  
B13: GAGTCGGTGCTGCGGCTGACGGACTACGAGACCGGGCAGATGGACCGACGGGCAAACCTG (WT)  
B14: GAGTCGGTGCTGCGGCTGACGGACTACGAGACCGGGCAGATGGACCGACGGGCAAACCTG (WT)  
B15: GAGTCGGTGCTGCGGCTGACGGA---CT--ACCGGGCAGATGGACCGACGGGCAAACCTG (-5bp)  
B16: GAGTCGGTGCTGCGGCTGACGGACTACGAGACCGGGCAGATGGACCGACGGGCAAACCTG (WT)  
B17: GAGTCGGTGCTGCGGCTGACGGA---CT--ACCGGGCAGATGGACCGACGGGCAAACCTG (-5bp)  
B18: GAGTCGGTGCTGCGGCTGACGGA---CC--ACCGGGCAGATGGACCGACGGGCAAACCTG (-6bp, +1bp)  
B19: GAGTCGGTGCTGCGGCTGACGGACTACGAGTCGGGCAGATGGACCGACGGGCAAACCTG (-1bp, +1bp)

N-Cas9-C mRNA: (indel:14,WT:5)

WT: GAGTCGGTGCTGCGGCTGACGGACTACGAGACCGGGCAGATGGACCGACGGGCAAACCTG  
m1: GAGTCGGTGCTGCGGCTGACGGACTACGAGACCGGGCAGATGGACCGACGGGCAAACCTG (WT)  
m2: GAGTCGGTGCTGCGGCTGACGGACTACGAGT-----AGATGGACCGACGGGCAAACCTG (-6bp)  
m3: GAGTCGGTGCTGCGGCTGACGGACTACGA-----GCAGATGGACCGACGGGCAAACCTG (-6bp)  
m4: GAGTCGGTGCTGCGGCTGACGGACTACGAGACCGGGCAGATGGACCGACGGGCAAACCTG (WT)  
m5: GAGTCGGTGCTGCGGCTGACGGACTACGA----GGCAGATGGACCGACGGGCAAACCTG (-5bp)  
m6: GAGTCGGTGCTGCGGCTGACGGACTACGA-----GGCAGATGGACCGACGGGCAAACCTG (-5bp)  
m7: GAGTCGGTGCTGCGGCTGCGGACTACGA-----GCAGATGGACCGACGGGCAAACCTG (-7bp, +1bp)  
m8: GAGTCGGTGCTGCGGCTGACGGACTACGACTACCGGGCAGATGGACCGACGGGCAAACCTG (-1bp, +2bp)  
m9: GAGTCGGTGCTGCGGCTGACGGACTACGAGACCGGGCAGATGGACCGACGGGCAAACCTG (WT)  
m10: GCGGCTGACGGACTACGATGGACTACTAAACACCGGGCAGATGGACCGACGGGCAAACCT (+13bp)  
m11: GAGTCGGTGCTGCGGCTGACGGACTACGAGACCGGGCAGATGGACCGACGGGCAAACCTG (WT)  
m12: GAGTCGGTGCTGCGGCTGACGGACTACGAGACCGGGCAGATGGACCGACGGGCAAACCTG (WT)  
m13: GAGTCGGTGCTGCGGCTGACGGATTACGA-----GCAGATGGACCGACGGGCAAACCTG (-6bp)  
m14: ACGGACTACGAGATGGACCGACGGTCCATCACCGGGCAGATGGACCGACGGGCAAACCTG (+18bp)  
m15: GAGTCGGTGCTGCGGCTGACGGACTAC-----GATGGACCGACGGGCAAACCTG (-11bp)  
m16: GAGTCGGTGCTGCGGCTGACGG-----GCAGATGGACCGACGGGCAAACCTG (-13bp)  
m17: CCGACTACGAGTTATTGAAAATCTGAGGTAATCAAATCGGCAGATGGACCGACGGGCAA (-4bp, +28bp)  
m18: GAGTCGGTGCTGCGGCTGACGGACTACGT-----CAGATGGACCGACGGGCAAACCTG (-8bp, +1bp)  
m19: ACAGCGGCTGACGTGAACGAGGCAGATGGACCGGGCAGATGGACCGACGGGCAAACCTG (-2bp, +10bp)

## Figure S7

### *gol target1:*

N-Cas9 protein: (indel:12,WT:5)

WT: TTCAGGTCTTGGTCTCTCGCAGGATGTTGCTGGAGCCACGTTTATGGCTGCGGGGAGTTTCG  
N1: TTCAGGTCTTGGTCTCTCGCAGGATG---CTGGAGCCACGTTTATGGCTGCGGGGAGTTTCG (-3bp)  
N2: TTCAGGTCTTGGTCTCTCGCAGGATGTTGCTGGAGCCACGTTTATGGCTGCGGGGAGTTTCG (WT)  
N3: TTCAGGTCTTGGTCTCTCGCAGGATG---CTGGAGCCACGTTTATGGCTGCGGGGAGTTTCG (-3bp)  
N4: TTCAGGTCTTGGTCTCTCGC-----TGGAGCCACGTTTATGGCTGCGGGGAGTTTCG (-10bp)  
N5: TCTTGGTCTCTCGCAGG-TCTCTCTCTTGGCTGGAGCCACGTTTATGGCTGCGGGGAGTTTCG (-2bp, +7bp)  
N6: TTCAGGTCTTGGTCTCTCGCAGGATGTTGCTGGAGCCACGTTTATGGCTGCGGGGAGTTTCG (WT)  
N7: TTCAGGTCTTGGTCTCTCGCAGGATGTTGCTGGAGCCACGTTTATGGCTGCGGGGAGTTTCG (WT)  
N8: TTCAGGTCTTGGTCTCTCGCAGGATG-----GAGCCACGTTTATGGCTGCGGGGAGTTTCG (-6bp)  
N9: TTCAGGTCTTGGTCTCTCGCAGGATGTTGCTGGAGCCACGTTTATGGCTGCGGGGAGTTTCG (WT)  
N10: TTCAGGTCTTGGTCTCTCGCAGGATG---CTGGAGCCACGTTTATGGCTGCGGGGAGTTTCG (-3bp)  
N11: TTCAGGTCTTGGTCTCTCGCAGGATGTTG---GAGCCACGTTTATGGCTGCGGGGAGTTTCG (-3bp)  
N12: TTCAGGTCTTGGTCTCTCGCAGGATG-----GAGCCACGTTTATGGCTGCGGGGAGTTTCG (-6bp)  
N13: TTCAGGTCTTGGTCTCTCGCAG-----CCACGTTTATGGCTGCGGGGAGTTTCG (-13bp)  
N14: TTCAGGTCTTGGTCTCTCGCAGGATG---CTGGAGCCACGTTTATGGCTGCGGGGAGTTTCG (-3bp)  
N15: TTCAGGTCTTGGTCTCTCG-----GAGCCACGTTTATGGCTGCGGGGAGTTTCG (-13bp)  
N16: TTCAGGTCTTGGTCTCTCGCAGGATGTTGCTGGAGCCACGTTTATGGCTGCGGGGAGTTTCG (WT)  
N17: TTCAGGTCTTGGTCTCTCGCAGGATG---CTGGAGCCACGTTTATGGCTGCGGGGAGTTTCG (-3bp)

C-Cas9 protein: (indel:16,WT:1)

WT: TTCAGGTCTTGGTCTCTCGCAGGATGTTGCTGGAGCCACGTTTATGGCTGCGGGGAGTTTCG  
C1: CTCTCGCAGGATGTGTATTATGCAGGATGCTGGAGCCACGTTTATGGCTGCGGGGAGTTTCG (+13bp)  
C2: CTCTCGCAGGATGTGTATTATGCAGGATGCTGGAGCCACGTTTATGGCTGCGGGGAGTTTCG (+13bp)  
C3: TTCAGGTCTTGGTCTCTCGCAGGATG---CTGGAGCCACGTTTATGGCTGCGGGGAGTTTCG (-3bp)  
C4: TTCAGGTCTTGGTCTCTCGCAGGATG---CTGGAGCCACGTTTATGGCTGCGGGGAGTTTCG (-3bp)  
C5: TTCAGGTCTTGGTCTCTCGCAGGATG---CTGGAGCCACGTTTATGGCTGCGGGGAGTTTCG (-3bp)  
C6: TTCAGGTCTTGGTCTCTCGCAGGATGT-GCTGGAGCCACGTTTATGGCTGCGGGGAGTTTCG (-1bp)  
C7: TTCAGGTCTTGGTCTCTCGCAGGATG---CTGGAGCCACGTTTATGGCTGCGGGGAGTTTCG (-3bp)  
C8: CTTGGTCTCTCGCAGGATGTAGTTTTCAGTCTGGAGCCACGTTTATGGCTGCGGGGAGTTTCG (+7bp)  
C9: TTCAGGTCTTGGTCTCTCGCAGGATGTTGCTGGAGCCACGTTTATGGCTGCGGGGAGTTTCG (WT)  
C10: TTCAGGTCTTGGTCTCTCGCAGGATG---CTGGAGCCACGTTTATGGCTGCGGGGAGTTTCG (-3bp)  
C11: TTCAGGTCTTGGTCTCTCGCAGGATG---CTGGAGCCACGTTTATGGCTGCGGGGAGTTTCG (-3bp)  
C12: TTCAGGTCTTGGTCTCTC-----TTGCTGGAGCCACGTTTATGGCTGCGGGGAGTTTCG (-8bp)  
C13: TTCAGGTCTTGGTCTCT-----GCTGGAGCCACGTTTATGGCTGCGGGGAGTTTCG (-11bp)  
C14: CTCTCGCAGGATGTGTATTATGCAGGATGCTGGAGCCACGTTTATGGCTGCGGGGAGTTTCG (+13bp)  
C15: TTCAGGTCTTGGTCTCTCGCAGGATG---CTGGAGCCACGTTTATGGCTGCGGGGAGTTTCG (-3bp)  
C16: TTCAGGTCTTGGTCTCTCGCAGGATG---CTGGAGCCACGTTTATGGCTGCGGGGAGTTTCG (-3bp)  
C17: TTCAGGTCTTGGTCTCTCGCAGGATG---CTGGAGCCACGTTTATGGCTGCGGGGAGTTTCG (-3bp)

N-Cas9-C protein: (indel:16,WT:0)

WT: TTCAGGTCTTGGTCTCTCGCAGGATGTTGCTGGAGCCACGTTTATGGCTGCGGGGAGTTTCG  
B1: TTCAGGTCTTGGTCTCTCGCAGGATG---CTGGAGCCACGTTTATGGCTGCGGGGAGTTTCG (-3bp)  
B2: AGGTCTTGGTCTCTCGCAGGATGT**GCG**TGCTGGAGCCACGTTTATGGCTGCGGGGAGTTTCG (+3bp)  
B3: TTCAGGTCT-----GCTGGAGCCACGTTTATGGCTGCGGGGAGTTTCG (-19bp)  
B4: TTCAGGTCTTGGTCTCTCGCAGGA**CG**-TGCTGGAGCCACGTTTATGGCTGCGGGGAGTTTCG (-2bp, +1bp)  
B5: TTCAGGTCTTGGTCTCTC-----TGCTGGAGCCACGTTTATGGCTGCGGGGAGTTTCG (-9bp)  
B6: TTCAGGTCTTGGTCTCTCGCAGGATG---CTGGAGCCACGTTTATGGCTGCGGGGAGTTTCG (-3bp)  
B7: CAGGTCTTGGTCTCT**TT**CAGG**TCT**TGGTCTGGAGCCACGTTTATGGCTGCGGGGAGTTTCG (-5bp, +7bp)  
B8: TTCAGGTCTTGGTCTCTCGCAGGATGTTG**T**TGGAGCCACGTTTATGGCTGCGGGGAGTTTCG (-1bp, +1bp)  
B9: TTCAGGTCTTGGTCTCTCGCAGGATG--CTGGAGCCACGTTTATGGCTGCGGGGAGTTTCG (-3bp)  
B10: TTGGTCTCTCGCAG**AGACCAAGCCACG**TGCTGGAGCCACGTTTATGGCTGCGGGGAGTTTCG (+11bp)  
B11: TTCAGGTCTTGGTCTCTC-----TGCTGGAGCCACGTTTATGGCTGCGGGGAGTTTCG (-9bp)  
B12: TTCAGGTCTTGGTCTCTCGCAGGATG---CTGGAGCCACGTTTATGGCTGCGGGGAGTTTCG (-3bp)  
B13: TTCAGGTCTTGGTCTCTCGCAGGATG-----ACCCACGTTTATGGCTGCGGGGAGTTTCG (-7bp)  
B14: TTCAGGTCTTGGTCTCTCGCAGGATG---CTGGAGCCACGTTTATGGCTGCGGGGAGTTTCG (-3bp)  
B15: TTCAGGTCTTGGTCTCTC-----TGCTGGAGCCACGTTTATGGCTGCGGGGAGTTTCG (-9bp)  
B16: TTCAGGTCTTGGTCTCTCGCAGGATG---CTGGAGCCACGTTTATGGCTGCGGGGAGTTTCG (-3bp)

N-Cas9-C mRNA: (indel:9,WT:9)

WT: TCAGGTCTTGGTCTCTCGCAGGATGTTGCTGGAGCCACGTTTATGGCTGCGGGGAGTTTCG  
m1: TCAGGTCTTGGTCTCTCGCAGGATGTTGCTGGAGCCACGTTTATGGCTGCGGGGAGTTTCG (WT)  
m2: TCAGGTCTTGGTCTCTCGCAGGATGTTGCTGGAGCCACGTTTATGGCTGCGGGGAGTTTCG (WT)  
m3: TCAGGTCTTGGTCTCTCGCAG-----AGCCACGTTTATGGCTGCGGGGAGTTTCG (-11bp)  
m4: TCAGGTCTTGGTCTCTCGCAGGATGTTGCTGGAGCCACGTTTATGGCTGCGGGGAGTTTCG (WT)  
m5: TCAGGTCTTGGTCTCTCGCAGGATGTTGCTGGAGCCACGTTTATGGCTGCGGGGAGTTTCG (WT)  
m6: TCTTGGTCTCTCGCAGGAT**GAATG**TGTGCTGGAGCCACGTTTATGGCTGCGGGGAGTT (+5bp)  
m7: TTCAGGTCTTGGTCTCTCGCAGGATGTTGCTGGAGCCACGTTTATGGCTGCGGGGAGTT (WT)  
m8: TTCAGGTCTTGGTCTCTCGCAGGATGTTGCTGGAGCCACGTTTATGGCTGCGGGGAGTT (WT)  
m9: TTCAGGTCTTGGTCTCTCGCAG-----AGCCACGTTTATGGCTGCGGGGAGTT (-11bp)  
m10: TTCAGGTCTTGGTCTCTCGCAGGATG--CTGGAGCCACGTTTATGGCTGCGGGGAGTT (-3bp)  
m11: CAGGTCTTGGTCTCTCGCAGGA-----GCCACGTTTATGGCTGCGGGGAGTTTCG (-10bp)  
m12: GATG-----A-----CGTCACTGC (-45bp)  
m13: TTCAGGTCTTGGTCTCTCGCAGGATGTTGCTGGAGCCACGTTTATGGCTGCGGGGAGTT (WT)  
m14: TCTTGGTCTCTCGCAGGAT**GAGCCACGTTTA**-TGAGCCACGTTTATGGCTGCGGGGGA (-1bp, +10bp)  
m15: CAGGTCTTGGTCTCTCGCAGGA-----GCCACGTTTATGGCTGCGGGGAGTTTCG (-10bp)  
m16: CAGGTCTTGGTCTCTCGCAGGATGTTGCTGGAGCCACGTTTATGGCTGCGGGGAGTTTCG (WT)  
m17: GTCTTGGTCTCTCGCAGGATGTTG**GAATG**TGCTGGAGCCACGTTTATGGCTGCGGGGAGTT (+5bp)  
m18: CAGGTCTTGGTCTCTCGCAGGATGTTGCTGGAGCCACGTTTATGGCTGCGGGGAGTTTCG (WT)

## Figure S8

### *gol target2:*

N-Cas9 protein: (indel:7,WT:13)

WT: TCTAGTGGGCTGGAGTGACGACAGCAGCCTGCGGGTCCAGCGCCGTTCCAGAAATGACA  
N1: TCTAGTGGGCTGGAGTGACGACAGCAGCCTGCGGGTCCAGCGCCGTTCCAGAAATGACA (WT)  
N2: TCTAGTGGGCTGGAGTGACGACAGCAG-----GGTCCAGCGCCGTTCCAGAAATGACA (-6bp)  
N3: TCTAGTGGGCTGGAGTGACGACAGCAGCCTGCGGGTCCAGCGCCGTTCCAGAAATGACA (WT)  
N4: TCTAGTGGGCTGGAGTGACGACAGCAGC---GGTCCAGCGCCGTTCCAGAAATGACA (-4bp)  
N5: TCTAGTGGGCTGGAGTGACGACAGCAGCCTGCGGGTCCAGCGCCGTTCCAGAAATGACA (WT)  
N6: TCTAGTGGG-----AATGACA (-43bp)  
N7: TCTAGTGGGCTGGAGTGACGACAGCAGCCTGCGGGTCCAGCGCCGTTCCAGAAATGACA (WT)  
N8: TCTAGTGGGC-----CA-GCG**CCGT**----TCCAGCGCCGTTCCAGAAATGACA (-20bp, +4bp)  
N9: TCTAGTGGGCTGGAGTGACGACAGCAGCCTGCGGGTCCAGCGCCGTTCCAGAAATGACA (WT)  
N10: TCTAGTGGGCTGGAGTGACGACAGCAGCCTGCGGGTCCAGCGCCGTTCCAGAAATGACA (WT)  
N11: TCTAGTGGGCTGGAGTGACGACAGCAGCCTGCGGGTCCAGCGCCGTTCCAGAAATGACA (WT)  
N12: TCTAGTGGGCTGGAGTG-----CTGCGGGTCCAGCGCCGTTCCAGAAATGACA (-11bp)  
N13: TCTAGTGGGCTGGAGTGACGACAGCA--CTGCGGGTCCAGCGCCGTTCCAGAAATGACA (-2bp)  
N14: TCTAGTGGGCTGGAGTGACGACAGCAG-----GTCCAGCGCCGTTCCAGAAATGACA (-7bp)  
N15: TCTAGTGGGCTGGAGTGACGACAGCAGCCTGCGGGTCCAGCGCCGTTCCAGAAATGACA (WT)  
N16: TCTAGTGGGCTGGAGTGACGACAGCAGCCTGCGGGTCCAGCGCCGTTCCAGAAATGACA (WT)  
N17: TCTAGTGGGCTGGAGTGACGACAGCAGCCTGCGGGTCCAGCGCCGTTCCAGAAATGACA (WT)  
N18: TCTAGTGGGCTGGAGTGACGACAGCAGCCTGCGGGTCCAGCGCCGTTCCAGAAATGACA (WT)  
N19: TCTAGTGGGCTGGAGTGACGACAGCAGCCTGCGGGTCCAGCGCCGTTCCAGAAATGACA (WT)  
N20: TCTAGTGGGCTGGAGTGACGACAGCAGCCTGCGGGTCCAGCGCCGTTCCAGAAATGACA (WT)

C-Cas9 protein: (indel:9,WT:7)

WT: TCTAGTGGGCTGGAGTGACGACAGCAGCCTGCGGGTCCAGCGCCGTTCCAGAAATGACA  
C1: TCTAGTGGGCTGGAGTGACGACAGCAGC-----GGTCC**GT**AAATGACA (-17bp, +2bp)  
C2: TCTAGTGGGCTGGAGTGACGACAGCAGC-----GGTCC**GT**AAATGACA (-17bp, +2bp)  
C3: TCTAGTGGGCTGGAGTG-----CGGGTCCAGCGCCGTTCCAGAAATGACA (-14bp)  
C4: TCTAGTGGGCTGGAGTGACGACAGCAGCCTGCGGGTCCAGCGCCGTTCCAGAAATGACA (WT)  
C5: TCTAGTGGGCTGGAGTGAC-----TGCGGGTCCAGCGCCGTTCCAGAAATGACA (-10bp)  
C6: TCTAGTGGGCTGGAGTGACGACAGCAGCCTGCGGGTCCAGCGCCGTTCCAGAAATGACA (WT)  
C7: TCTAGTGGGCTGGAGTGACGACAGCAGCCTGCGGGTCCAGCGCCGTTCCAGAAATGACA (WT)  
C8: TCTAGTGGGCTGGAGTGACGACAGCAGCCTGCGGGTCCAGCGCCGTTCCAGAAATGACA (WT)  
C9: TCTAGTGGGCTGGAGTGACGACAGCAG-----GTCCAGCGCCGTTCCAGAAATGACA (-7bp)  
C10: TCTAGTGGGCTGGAGTGACGACAGCAGCCTGCGGGTCCAGCGCCGTTCCAGAAATGACA (WT)  
C11: TCTAGTGGGCTGGAGTGACGACAGCAGCCTGCGGGTCCAGCGCCGTTCCAGAAATGACA (WT)  
C12: TCTAGTGGGCTG-----CGGGTCCAGCGCCGTTCCAGAAATGACA (-19bp)  
C13: TGACGACAGCAGCAG**GGTCGAGGGTCG**ACTGCGGGTCCAGCGCCGTTCCAGAAATGACA (+12bp)  
C14: TCTAGTGGGCTGGAGTGACGACAGCAGCCTGCGGGTCCAGCGCCGTTCCAGAAATGACA (WT)  
C15: TCTAGTGGGCTGGAGTGACGAC-----CAGAAATGACA (-26bp)  
C16: TCTAG---CCT-----CTGCGGGTCCAGCGCCGTTCCAGAAATGACA (-20bp)

N-Cas9-C protein: (indel:12,WT:7)

WT: TCTAGTGGGCTGGAGTGACGACAGCAGCCTGCGGGTCCAGCGCCGTTCCAGAAATGACA  
B1: TCTAGTGGGCTGGAGTGACGACAGCAGCCTGCGGGTCCAGCGCCGTTCCAGAAATGACA (WT)  
B2: TCTAGTGGGCTGGAGTGACGACAGCAG-----GGTCCAGCGCCGTTCCAGAAATGACA (-6bp)  
B3: TCTAGTGGGCTGGAGTGACGACAGCAG-----GGTCCAGCGCCGTTCCAGAAATGACA (-6bp)  
B4: TCTAGTGGGCTGGAGTGACGACAGCAGCCTGCGGGTCCAGCGCCGTTCCAGAAATGACA (WT)  
B5: GTGACGACAGCAGCTCTGGGTCTGCAGCTGCGGGTCCAGCGCCGTTCCAGAAATGACAG (+13bp)  
B6: TCTAGTGGGCTGGAGTGACAAACAGCAGCCTGCGGGTCCAGCGCCGTTCCAGAAATGACA (-1bp,+1bp)  
B7: TCTAGTGGGCTGGAGTGACGACAGCAGCCTGCGGGTCCAGCGCCGTTCCAGAAATGACA (WT)  
B8: TCTAGTGGGCTGGAGTGACGACAGCAGC----GGTCCAGCGCCGTTCCAGAAATGACA (-4bp)  
B9: TCTAGTGGGCTGGAGTGACGACAGCAGCCTGCGGGTCCAGCGCCGTTCCAGAAATGACA (WT)  
B10: GGAGTGACGACAGCATACCGGTATGTACTGCGGGTCCAGCGCCGTTCCAGAAATGACA (-1bp,+12bp)  
B11: TCTAGTGGGCTGGAGTGACGACAGCAGCCTGCGGGTCCAGCGCCGTTCCAGAAATGACA (WT)  
B12: TCTAGTGGGCTGGAGTGACGACAGCAG-----GTCCAGCGCCGTTCCAGAAATGACA (-7bp)  
B13: TCTAGTGGGC-----GGTCCAGCGCCGTTCCAGAAATGACA (-22bp)  
B14: TCTAGTGGGCTGGAGTGACGACAGCAG-----GGTCCAGCGCCGTTCCAGAAATGACA (-6bp)  
B15: TCTAGTGGGCTGGAGTGACGACAG-----GTCCAGCGCCGTTCCAGAAATGACA (-10bp)  
B16: TCTAGTGGGCTGGAGTGACGACAGCAGCCTGCGGGTCCAGCGCCGTTCCAGAAATGACA (WT)  
B17: TCTAGTGGGCTGGAGTGACGACAG-----GGTCCAGCGCCGTTCCAGAAATGACA (-9bp)  
B18: TCTAGTGGGCTGGAGTGACGACAGCAGCCTGCGGGTCCAGCGCCGTTCCAGAAATGACA (WT)  
B19: TCTAGTGGGCTGGAGTGACGACAGC-GCCTGTGGGTCCAGCGCCGTTCCAGAAATGACA (-2bp,+1bp)

N-Cas9-C mRNA: (indel:8,WT:12)

WT: CAGCCTCTAGTGGGCTGGAGTGACGACAGCAGCCTGCGGGTCCAGCGCCGTTCCAGAAATGACA  
m1: CAGCTTCTAGTGGGCTGGAGTGACGACAGCAG-----GGTCCAGCGCCGTTCCAGAGA (-7bp,+1bp)  
m2: CAGCTTCTAGTGGGCTGGAGTGACGACAGCAG-----GGTCCAGCGCCGTTCCAGAGA (-7bp,+1bp)  
m3: TCTAGTGGGCTGGAGTGCGCAGCAGCCTGCGGGTCCAGCGCCGTTCCAGAAATGACA (-1bp,+1bp)  
m4: TCTAGTGGGCTGGAGTGACGACAGCAGC----GGTCCAGCGCCGTTCCAGAAATGACA (-4bp)  
m5: TCTAGTGGGCTGGAGTGACGACAGCAGCCTGCGGGTCCAGCGCCGTTCCAGAAATGACA (WT)  
m6: TCTAGTGGGCTGGAGTGACGACAGCAGCCTGCGGGTCCAGCGCCGTTCCAGAAATGACA (WT)  
m7: TCTAGTGGGCTGGAGTGACGTCAGCA-----GGTCCAGCGCCGTTCCAGAAATGACA (-6bp)  
m8: TCTAGTGGGCTGGAGTGACGACAGCAGCCTGCGGGTCCAGCGCCGTTCCAGAAATGACA (WT)  
m9: TCTAGTGGGCTGGAGT-----CCAGCGCCGTTCCAGAAATGACA (-20bp)  
m10: TCTAGTGGGCTGGAGTGACGACAGCAGC----GGTCCAGCGCCGTTCCAGAAATGACA (-4bp)  
m11: TCTAGTGGGCTGGAGTGACGACAGCAGCCTGCGGGTCCAGCGCCGTTCCAGAAATGACA (WT)  
m12: TCTAGTGGGCTGGAGTGACGACAGCAGCCTGCGGGTCCAGCGCCGTTCCAGAAATGACA (WT)  
m13: TCTAGTGGGCTGGAGTGACGACAGCAGCCTGCGGGTCCAGCGCCGTTCCAGAAATGACA (WT)  
m14: TCTAGTGGGCTGGAGTGACGACAGCAGCCTGCGGGTCCAGCGCCGTTCCAGAAATGACA (WT)  
m15: TCTAGTGGGCTGGAGTGACGACAGCAGCCTGCGGGTCCAGCGCCGTTCCAGAAATGACA (WT)  
m16: TCTAGTGGGCTGGAGTGACGACAGCAGCCTGCGGGTCCAGCGCCGTTCCAGAAATGACA (WT)  
m17: TCTAGTGGGCTGGAGTGACGACAGCAGCCTGCGGGTCCAGCGCCGTTCCAGAAATGACA (WT)  
m18: TCTAGTGGGCTGGAGTGACGACAGCAG-----GTCCAGCGCCGTTCCAGAAATGACA (-7bp)  
m19: TCTAGTGGGCTGGAGTGACGACAGCAGCCTGCGGGTCCAGCGCCGTTCCAGAAATGACA (WT)  
m20: TCTAGTGGGCTGGAGTGACGACAGCAGCCTGCGGGTCCAGCGCCGTTCCAGAAATGACA (WT)

**Table S1.** Target sites and target region primers for *tyr* gene and *gol* gene.

|              | Target site          | Forward primer            | Reverse primer            |
|--------------|----------------------|---------------------------|---------------------------|
| <i>tyr1</i>  | CCCCAGAAGTCCTCCAGTCC | GCGTCTCACTCTCCTCGACTCTTC  | GTAGTTTCCGGCGCACTGGCAG    |
| <i>tyr2</i>  | GGCTGACGGACTACGAGACC | AATGTCGTTCACTCTGCTGTT     | TGGCTTTAAAGTGGACGCTG      |
| <i>gol1</i>  | GGTCTCTCGCAGGATGTTGC | AGGTCATCAGCGAGCGTAAG      | CACTGACGGATCTCTGCACT      |
| <i>gol1'</i> |                      | TGCAGTTTTTCTTGGTGTTCTTTGA | TTTCTCTCATATATCTACCCGATAG |
| <i>gol2</i>  | GGAGTGACGACAGCAGCCTG | TGTGTGTGCAGGTATGATGG      | CAGGCTGAGCGATAGATGTG      |

\* *gol1'* primers used for the second and third experiment and multiplex injection experiment.
